# Supplementary material
Source: PubMed Central journal article supplement (PMC6483872)
Supplement: NIHMS1526321-supplement-2.pdf [file NIHMS1526321-supplement-2.pdf]

| <i>E. coli</i>                                                                                                                                           | <i>Salmonella</i>                                                                                                                                        |
|----------------------------------------------------------------------------------------------------------------------------------------------------------|----------------------------------------------------------------------------------------------------------------------------------------------------------|
| <i>acrA</i> (Multidrug efflux system)<br>AUG AAC AAA AAC AGA GGG UUU ACG <b>CCU</b> CUG<br>M N K N R G F T <b>P</b> L                                    | <i>acrA</i> (Multidrug efflux system)<br>AUG AAC AAA AAC AGA GGG UUA ACG <b>CCU</b> CUG<br>M N K N R G L T <b>P</b> L                                    |
| <i>acrB</i> (Multidrug efflux system)<br>AUG <b>CCU</b> AAU UUC UUU AUC GAU CGC CCG AUU<br>M <b>P</b> N F F I D R <b>P</b> I                             | <i>acrB</i> (Multidrug efflux system)<br>AUG <b>CCU</b> AAU UUC UUU AUC GAU CGC <b>CCU</b> AUA<br>M <b>P</b> N F F I D R <b>P</b> I                      |
| <i>acrD</i> (Aminoglycoside efflux pump)<br>AUG GCG AAU UUC UUU AUU GAU CGC <b>CCC</b> AUU<br>M A N F F I D R <b>P</b> I                                 | <i>acrD</i> (Aminoglycoside efflux pump)<br>AUG GCG AAU UUU UUU AUC GAU CGC <b>CCC</b> AUU<br>M A N F F I D R <b>P</b> I                                 |
| <i>emrE</i> (Multidrug resistance protein)<br>AUG AAC <b>CCU</b> UAU<br>M N <b>P</b> Y                                                                   | <i>emrE</i> (Multidrug resistance protein)<br>AUG ACU AAA GAA<br>M T K E                                                                                 |
| <i>fsr</i> (Fosmidomycin efflux system)<br>AUG GCA AUG AGU GAA CAA <b>CCC</b> CAG<br>M A M S E Q <b>P</b> Q                                              | <i>fsr</i> (Fosmidomycin efflux system)<br>AUG GCC AUG AGU GAA CCA ACC<br>M A M S E P T                                                                  |
| <i>lplB</i> (Outer membrane lipoprotein)<br>AUG <b>CCC</b> CUG <b>CCC</b> GAU<br>M <b>P</b> L <b>P</b> D                                                 | <i>lplB</i> (Outer membrane lipoprotein)<br>AUG ACC CUG <b>CCC</b> GAU UUU<br>M T L P D F                                                                |
| <i>lptG</i> (lipopolysaccharide transporter)<br>AUG CAA <b>CCU</b> UUU<br>M Q <b>P</b> F                                                                 | <i>lptG</i> (lipopolysaccharide transporter)<br>AUG CAG CCA UUU<br>M Q P F                                                                               |
| <i>lpxD</i> (Lipid A biosynthesis)<br>AUG <b>CCU</b> UCA AUU<br>M <b>P</b> S I                                                                           | <i>lpxD</i> (Lipid A biosynthesis)<br>AUG <b>CCU</b> UCA AUU<br>M <b>P</b> S I                                                                           |
| <i>mdtB</i> (Multidrug efflux system)<br>AUG CAG GUG UUA <b>CCC</b> CCG<br>M Q V L <b>P</b> P                                                            | <i>mdtB</i> (Multidrug efflux system)<br>AUG CAG GUA UUA <b>CCU</b> CCG<br>M Q V L <b>P</b> P                                                            |
| <i>mdtG</i> (Drug efflux system)<br>AUG UCA <b>CCC</b> UGU GAA AAU GAC ACC <b>CCU</b> AUA<br>M S <b>P</b> C E N D T <b>P</b> I                           | <i>mdtG</i> (Drug efflux system)<br>AUG UCA <b>CCC</b> UCU GAU GUC <b>CCC</b> AUA<br>M S <b>P</b> S D V <b>P</b> I                                       |
| <i>nuoM</i> (NADH:ubiquinone oxidoreductase subunit)<br>AUG UUA CUA <b>CCC</b> UGG CUA AUA UUA AUU <b>CCC</b> UUU<br>M L L <b>P</b> W L I L I <b>P</b> F | <i>nuoM</i> (NADH:ubiquinone oxidoreductase subunit)<br>AUG UUA UUA <b>CCC</b> UGG UUG AUA UUA AUC <b>CCC</b> UUU<br>M L L <b>P</b> W L I L I <b>P</b> F |
| <i>tolC</i> (Outer membrane channel)<br>AUG AAG AAA UUG CUC <b>CCC</b> AUU<br>M K K L L <b>P</b> I                                                       | <i>tolC</i> (Outer membrane channel)<br>AUG AAG AAA UUG CUC <b>CCC</b> AUC<br>M K K L L <b>P</b> I                                                       |

**Figure S1 (Related to Figure 1). The CC[C/U] codon occurs near the initiation codon of Gram-negative membrane-associated genes.** Sequences of selected membrane-associated genes in *E. coli* and *Salmonella* up to the first 15 codons, showing CC[C/U] codons in red.

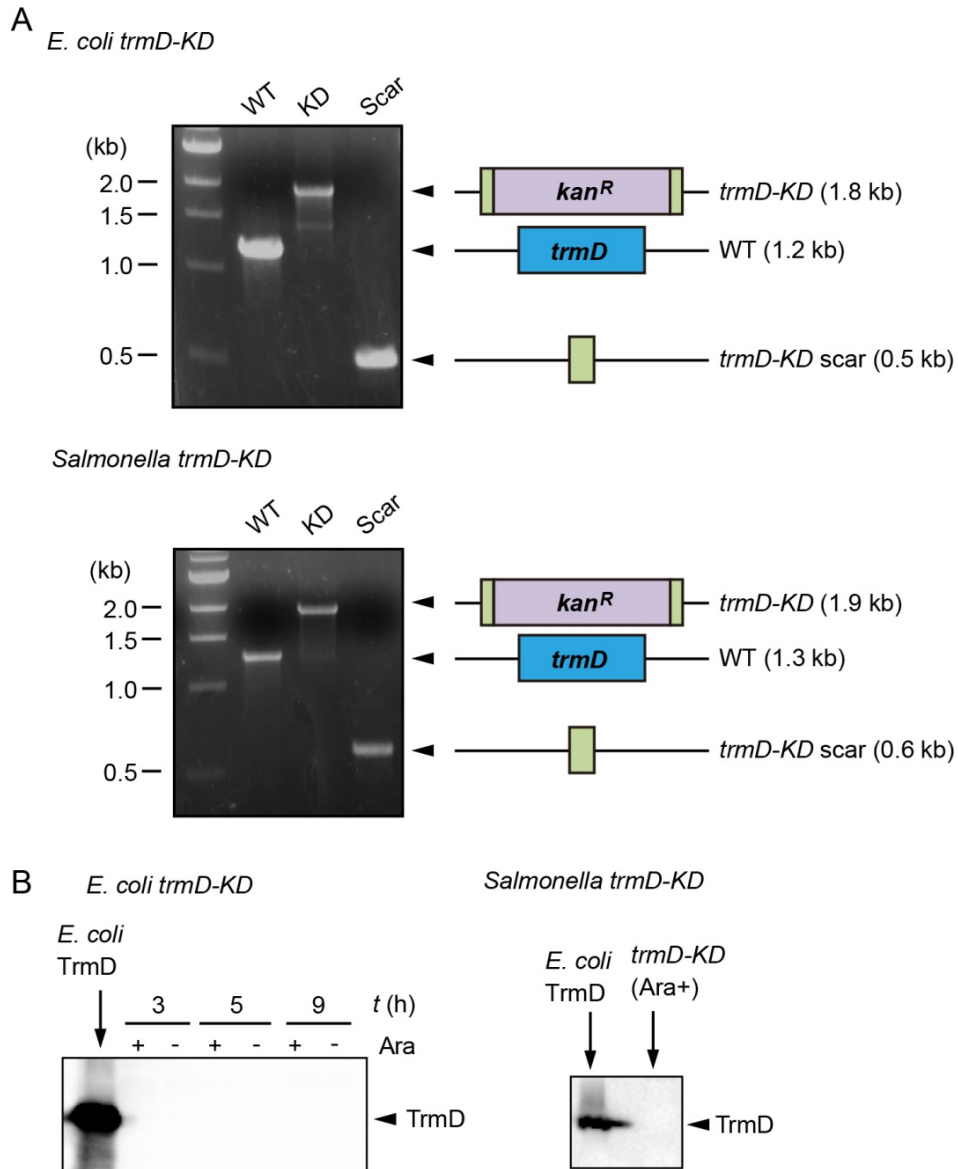

**Figure S2 (Related to Figure 1). Validation of *trmD-KD* strain construction.** (A) The chromosomal *trmD* loci from *E. coli* (top) and *Salmonella* (bottom) were amplified via PCR using primers hybridized to the *trmD*-flanking regions. *trmD-KD* cells were constructed via  $\lambda$ -Red recombination, replacing the entire *trmD* sequence with a *kan<sup>R</sup>* marker. The marker was subsequently removed with FLP recombinase encoded in pCP20, converting the locus into a scar sequence. (B) *E. coli trmD-KD* cells maintained with human Trm5 were grown in Ara+ or Ara- conditions for the indicated time period. Western blotting of whole-cell lysates with antibodies against *Salmonella* TrmD, along with the loading control of purified *E. coli* TrmD, showed no trace of the protein. Whole-cell lysates from *Salmonella trmD-KD* cells grown to mid-log phase also showed no trace of the protein.

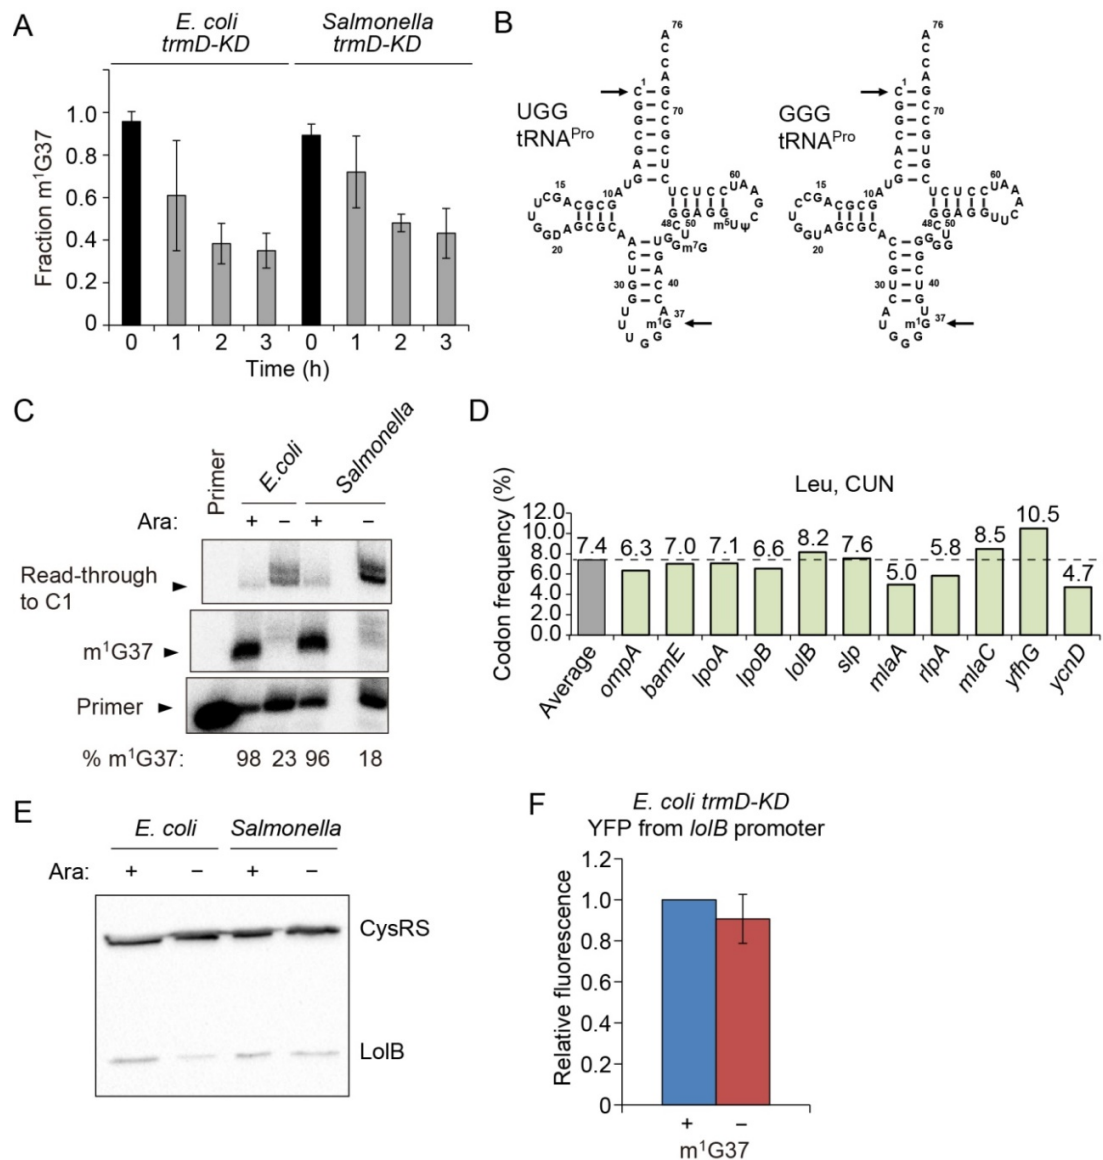

**Figure S3 (Related to Figure 2). m<sup>1</sup>G37-tRNA levels are decreased over time in *E. coli* and *Salmonella trmD-KD* cells.** (A) Levels of m<sup>1</sup>G37 decreased during pre-depletion of *E. coli trmD-KD* and *Salmonella trmD-KD* cells. Overnight cultures were diluted 1:100 into fresh LB without arabinose (Ara) and grown at 37 °C to deplete pre-existing Trm5 protein and m<sup>1</sup>G37-tRNAs. At 0, 1, 2, and 3 h after inoculation, the fraction of tRNA<sup>Pro/UGG</sup> containing m<sup>1</sup>G37 was determined via primer extension using a primer specific for the UGG isoacceptor (Figure 1F; STAR Methods). (B) Sequences and cloverleaf structures of isoacceptor tRNA<sup>Pro/UGG</sup> and tRNA<sup>Pro/GGG</sup> of *E. coli*. The m<sup>1</sup>G37 positions and the first nucleotide C1 are indicated by an arrow. (C) m<sup>1</sup>G37 levels in the absence of Ara are low for the GGG isoacceptor of *E. coli* and *Salmonella* tRNA<sup>Pro</sup>. Gel analysis of primer extension of *E. coli* tRNA indicated stoppage at m<sup>1</sup>G37 at 23% vs. 98% in the Ara<sup>-</sup> vs. Ara<sup>+</sup> condition. Gel analysis of primer extension of *Salmonella* tRNA indicates stoppage at m<sup>1</sup>G37 at 18% vs. 96% in the Ara<sup>-</sup> vs. Ara<sup>+</sup> condition. (D) Leu codon CUN usage of genes encoding *E. coli* outer-membrane proteins that showed reduced abundance in the membrane proteomic analysis in the Ara<sup>-</sup> vs. Ara<sup>+</sup> condition. Relative to the average CUN codon usage in *E. coli* (7.4%), these genes for outer-membrane proteins do not show abundance of the codon, indicating that the reduction of their protein abundance is not correlated with CUN codon usage. (E) Western blotting analysis showed that protein level of LolB is decreased relative to CysRS in Ara<sup>-</sup> vs. Ara<sup>+</sup> cells of *E. coli* and *Salmonella*. (F) Transcription from the *E. coli lolB* promoter was similar in m<sup>1</sup>G37<sup>+</sup> and m<sup>1</sup>G37<sup>-</sup> conditions (where m<sup>1</sup>G37<sup>-</sup> indicates m<sup>1</sup>G37 deficiency), using YFP as the reporter (STAR Methods). Signal intensity was normalized to cell density in each condition. The expression level and error bars in m<sup>1</sup>G37<sup>+</sup> vs. m<sup>1</sup>G37<sup>-</sup> cells are the mean ± SD, n = 3.

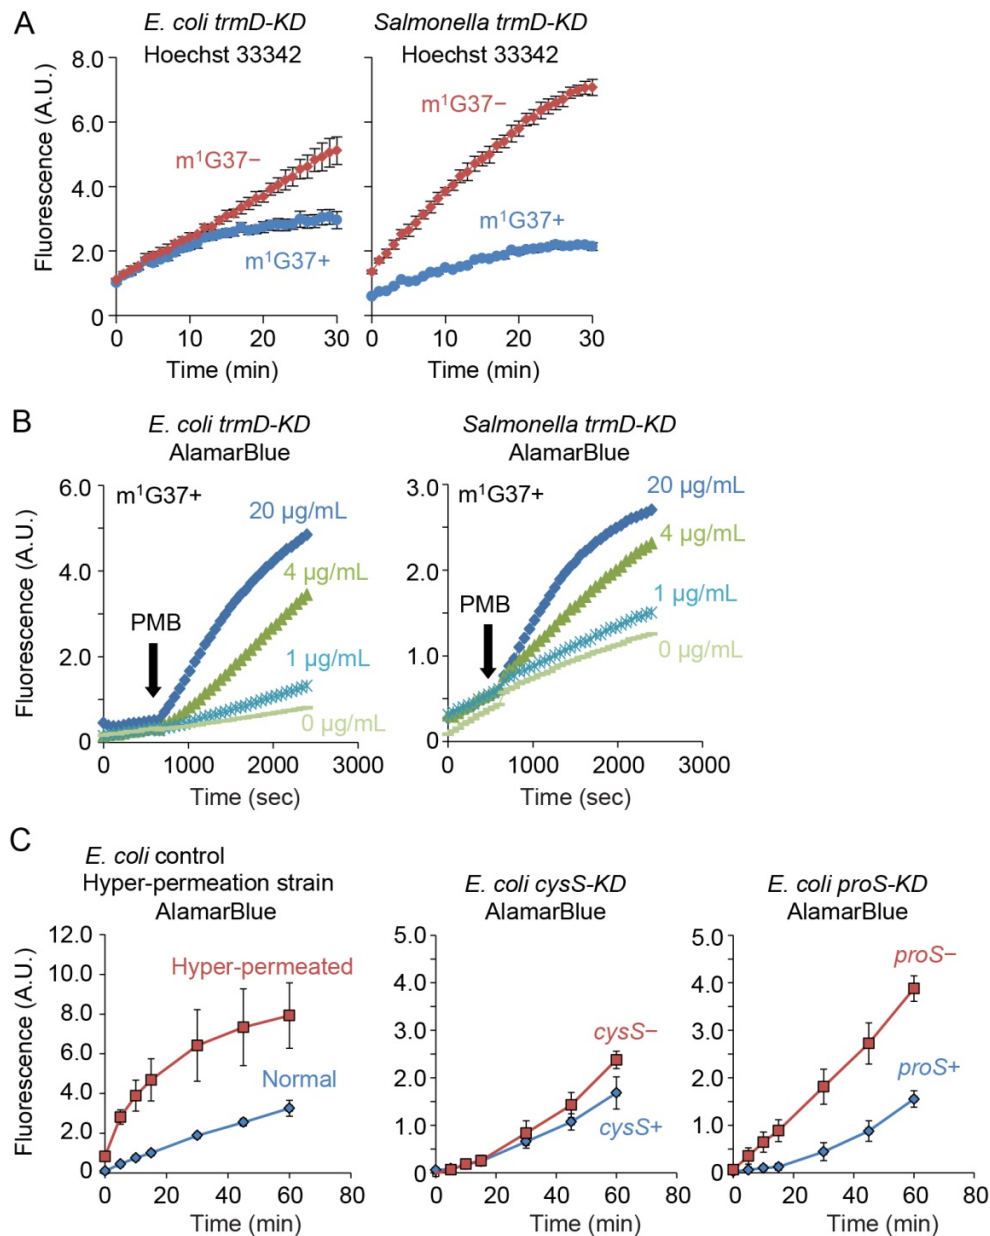

**Figure S4 (Related to Figure 3). *E. coli trmD-KD* cells and *Salmonella trmD-KD* cells show higher membrane permeability to AlamarBlue and Hoechst 33342 in  $m^1G37$ -deficient vs.  $m^1G37^+$  conditions.**

**(A)** In addition to AlamarBlue, Hoechst 33342 dye was also used for permeability assay. Levels of intracellular accumulation of the dye are shown over time. Data and error bars are mean  $\pm$  SD,  $n = 3$ , and  $m^1G37^-$  indicates  $m^1G37$ -deficient cells. Both *E. coli trmD-KD* (left) and *Salmonella trmD-KD* (right) showed higher uptake of the dye in the  $m^1G37^-$  relative to the  $m^1G37^+$  condition. **(B)** Polymyxin B permeabilizes the cell membrane to promote dye accumulation. *E. coli trmD-KD* (left) and *Salmonella trmD-KD* (right) were grown in the  $m^1G37^+$  condition and the uptake of AlamarBlue was monitored for 10 min. Polymyxin B was then added at the indicated concentrations and the dye uptake was monitored over the next 30 min. Data show a dose-dependent uptake of AlamarBlue. **(C)** Faster uptake of AlamarBlue in membrane-permeabilized cells. A hyper-permeable strain (Krishnamoorthy *et al*, 2016), expressing a mutant of the outer membrane FhuA pore protein, was used for AlamarBlue accumulation assay (left). Cells with FhuA over-expression (defective outer membrane, red) showed faster uptake of the dye compared to a condition without over-expression (normal membrane, blue). *E. coli cysS-KD* (middle) and *proS-KD* (right) cells were used for the accumulation assay; when depleted of the respective protein product (red), faster uptake of the dye was observed compared to the non-depleted condition (blue) for the *proS-KD* strain but not for the *cysS-KD* strain. Data and errors bars are mean  $\pm$  SD,  $n = 3$ .

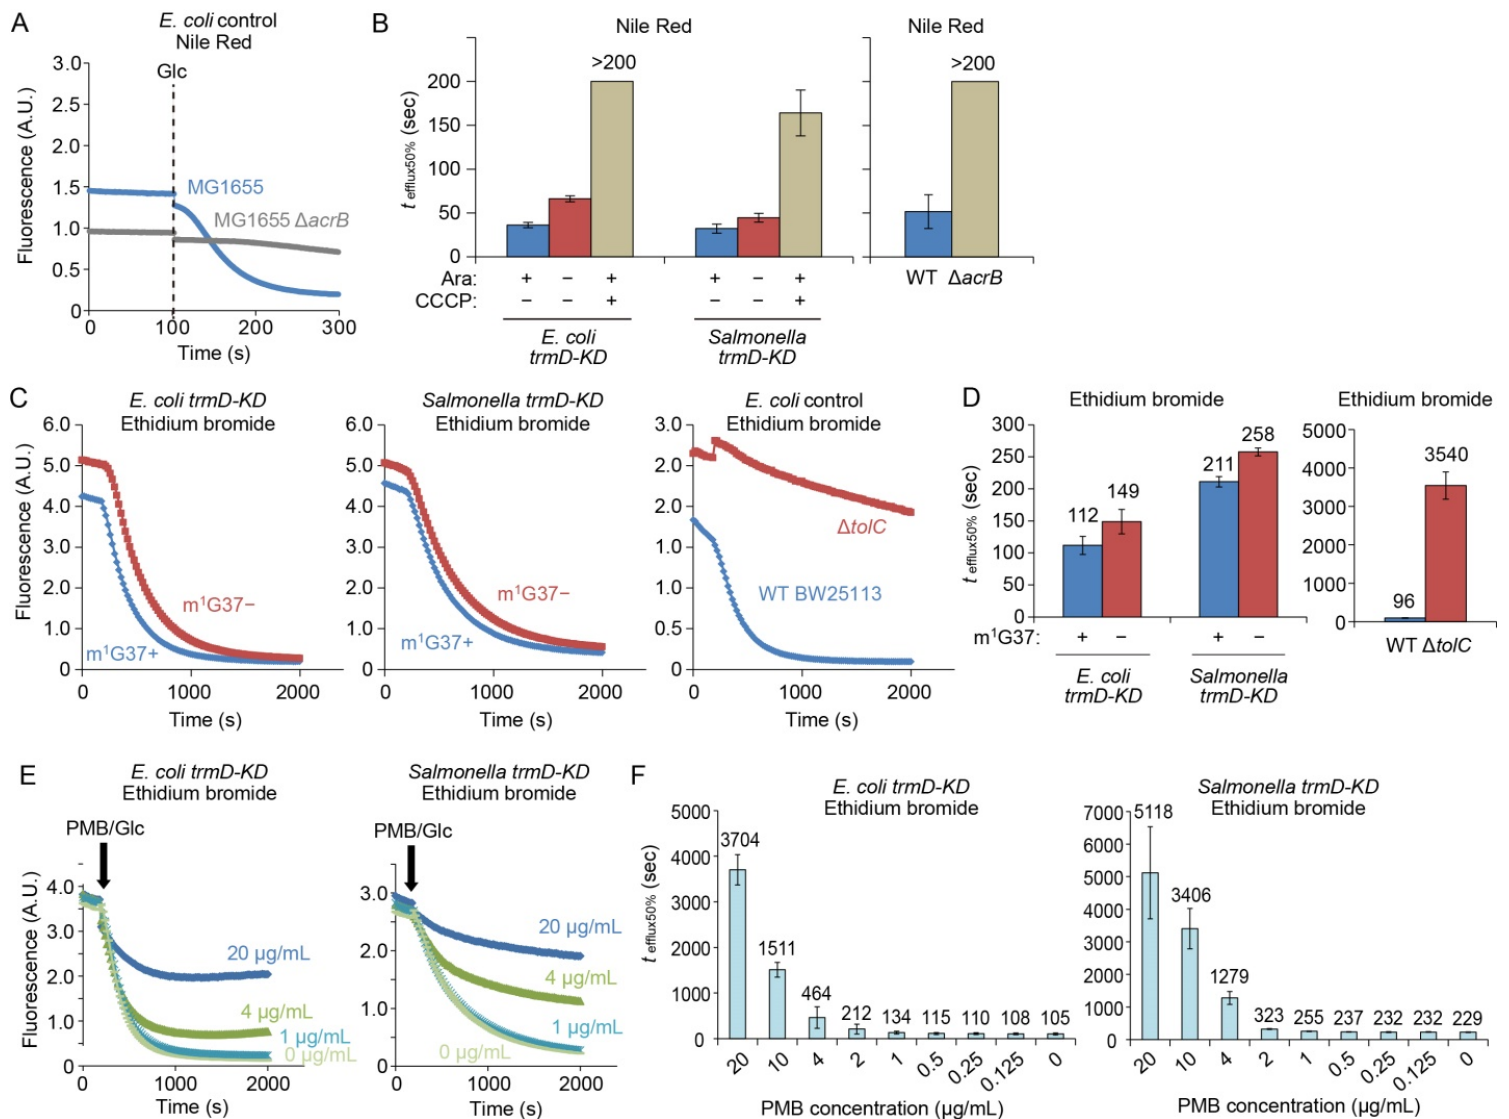

**Figure S5 (Related to Figure 3): *E. coli trmD-KD* and *Salmonella trmD-KD* cells show less efflux of Nile Red in  $m^1G37$ -deficient vs.  $m^1G37+$  conditions. (A and B)** Control experiment for Nile Red assay in Figure 3C-3E. The lack of efflux in  $m^1G37+$  cells in the presence of CCCP and in MG1655  $\Delta$ *acrB* cells served as negative controls, while the efflux of Nile Red by wild-type MG1655 cells served as a positive control (A). The full data set for  $t_{\text{efflux}50\%}$  measurements as in Figure 3E is shown in (B). Errors are mean  $\pm$  SD,  $n = 3$ , and  $m^1G37-$  indicates  $m^1G37$  deficiency. **(C and D)** In addition to Nile Red, ethidium bromide (EtBr) was used to investigate efflux activity. *E. coli trmD-KD* (C, left) and *Salmonella trmD-KD* (C, middle) were grown in  $m^1G37+$  or  $m^1G37$ -deficient conditions, and cells were washed and incubated in Nile Red buffer with 50  $\mu$ M CCCP and 10  $\mu$ g/mL EtBr for pre-loading for 2 h at 30  $^{\circ}$ C. Cells were washed and the EtBr fluorescence was monitored over 3 min, then efflux was activated by the addition of 50 mM glucose, followed by fluorescence measurements for 30 min. *E. coli* BW25113 wild-type and  $\Delta$ *tolC* strains were used as controls (C, right).  $t_{\text{efflux}50\%}$  is summarized in (D). Data and error bars are mean  $\pm$  SD,  $n = 3$ , and  $m^1G37-$  indicates  $m^1G37$  deficiency. **(E and F)** Polymyxin B inactivates the efflux system. *E. coli trmD-KD* (E, left) and *Salmonella trmD-KD* (E, right) were grown in the  $m^1G37+$  condition and processed as in (C). After the initial 3 min fluorescence measurement, polymyxin B was added at the indicated concentrations and cells were incubated at room temperature for 5 min. Efflux was then activated by the addition of 50 mM glucose, followed by fluorescence measurements for 30 min.  $t_{\text{efflux}50\%}$  is summarized in (F) and the data show reduced efflux activity in a dose-dependent manner. Data and error bars are mean  $\pm$  SD,  $n = 3$ .

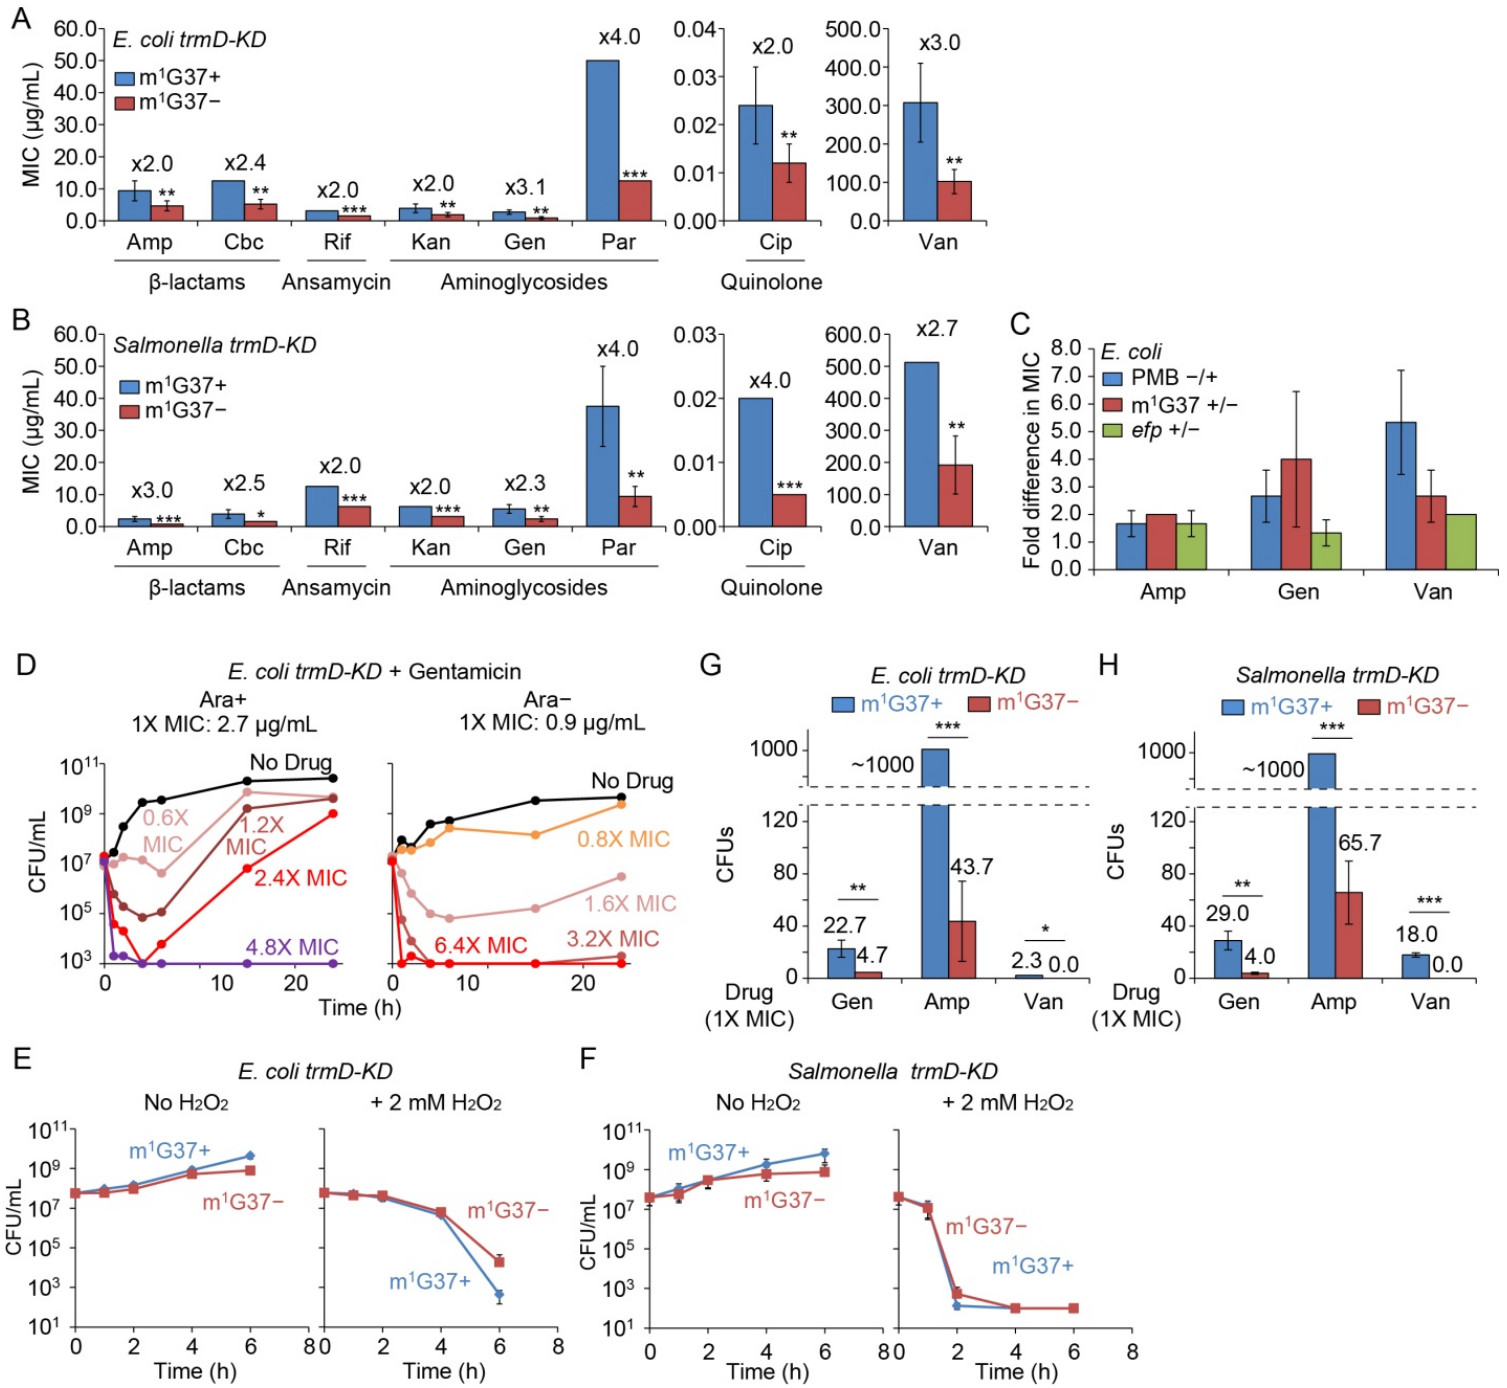

**Figure S6 (Related to Figure 4). *E. coli trmD-KD* cells are sensitized to antibiotics. (A and B)** The original antibiotic MIC values of *E. coli trmD-KD* (A) and *Salmonella trmD-KD* (B) cells under m<sup>1</sup>G37<sup>+</sup> (blue) and m<sup>1</sup>G37<sup>-</sup> (red) conditions used to generate Figure 4A, 4B. Error bars are SD from at least 3 independent experiments. “X” denotes the fold-change between m<sup>1</sup>G37<sup>+</sup> and m<sup>1</sup>G37<sup>-</sup> cells. Welch’s *t*-test: \**p* < 0.1, \*\**p* < 0.05, \*\*\**p* < 0.01. Amp, ampicillin; Cbc, carbenicillin; Rif, rifampicin; Kan, kanamycin; Gen, gentamicin; Par, paromomycin; Cip, Ciprofloxacin; Van, vancomycin. m<sup>1</sup>G37<sup>-</sup> indicates m<sup>1</sup>G37-deficient cells. (C) Comparison of the effect on MIC between polymyxin B, m<sup>1</sup>G37-deficiency, and deletion of *efp*. EF-P is a translation factor that relieves ribosomes from stalling at consecutive proline codons and previous studies demonstrated its contribution to membrane integrity and antibiotic resistance (Navarre et al, 2010; Zou et al, 2012). MIC values of Amp, Gen, and Van were determined for *E. coli* BW25113 wild-type and  $\Delta$ *efp* strains, and

the calculated MIC difference due to *efp* deletion (green) is shown along with those of polymyxin B (blue) and  $m^1G37$  deficiency (red). **(D)** Time-kill plots of cell survival (CFU/mL) as a function of gentamicin concentration for *E. coli trmD-KD* cells in  $m^1G37+$  (Ara+) or  $m^1G37$ -deficient (Ara-) conditions ( $n = 1$ ). Survival was lower in  $m^1G37$ -deficient cells than in  $m^1G37+$  cells. *E. coli trmD-KD* cells were prepared as described in Figure 4C, 4D. **(E and F)** Time-kill plots of cell survival (CFU/mL) by oxidative stress. Overnight cultures of *E. coli trmD-KD* (E) and *Salmonella trmD-KD* (F) were pre-depleted as in time-kill assays (Figure 4C, 4D). Cells were then freshly inoculated into LB at  $10^7$  CFU/mL with (blue) or without (red) 0.2% Ara and without (left) or with (right) 2 mM  $H_2O_2$ . At 0, 1, 2, 4, and 6 h after  $H_2O_2$  treatment, 10-fold serial dilutions of cells were spotted on LB plates with 0.2% Ara to determine CFU/mL.  $m^1G37-$  indicates  $m^1G37$ -deficient cells. **(G and H)** Resistance analysis of *trmD-KD* cells of *E. coli* (G) and *Salmonella* (H) against gentamicin, ampicillin, and vancomycin, with each drug tested at 1X MIC appropriate for  $m^1G37+$  and  $m^1G37$ -deficient conditions. Resistance was more frequent by at least 5-fold for  $m^1G37+$  relative to  $m^1G37$ -deficient cells in all cases ( $n = 3$ ).

*muxC* *Pseudomonas*  
AUG AGU CUG UCC ACG CCC UUC  
M S L S T P F

*opmB* *Pseudomonas*  
AUG AAA CAC ACC CCC UCG  
M K H T P S

*acrB* *Shigella*  
AUG CCU AAU UUC UUU  
M P N F F

*lpxD* *Shigella*  
AUG CCU UCA AUU CGA  
M P S I R

*Serratia*  
AUG CCU UCA AUU CGA  
M P S I R

*Yersinia*  
AUG CCU UCA AUU CGA  
M P S I R

*tolC* *Shigella*  
AUG AAG AAA UUG CUC CCC AUU  
M K K L L P I

*Serratia*  
AUG AAG AAA CUG CUC CCC CUU  
M K K L L P L

*Yersinia*  
AUG AAG AAA CUG CUC CCC CUU  
M K K L L P L

**Figure S7 (Related to Figure 7): Gram-negative pathogens contain CC[C/U] codons in membrane-associated genes.** Membrane-associated genes with CC[C/U] codons (red) near the start of each open reading frame are shown for *Pseudomonas aeruginosa*, *Shigella dysenteriae*, *Serratia marcescens*, and *Yersinia pestis*.
